# Supplementary material for: Intermolecular interaction and mechanical properties of energetic plasticizer MN reinforced 2,4,6-trinitrotoluene/1,3,5-trinitrohexahydro-1,3,5-triazine molten-energetic-composite (MEC)
Source: Royal Society of Chemistry journal article supplement (doi:10.1039/c5ra03666f), 2015-01-01
Supplement: c5ra03666f1.pdf [file c5ra03666f1.pdf]

## **Supporting Information**

# **Intermolecular interaction and mechanical properties of energetic plasticizer MNs reinforced 2,4,6- trinitrotoluene/1,3,5-trinitrohexahydro-1,3,5-triazine molten-energetic-composite(MEC)**

**Qing Ma,<sup>a,b</sup> Maoping Wen,<sup>a</sup> Baohui Zheng,<sup>\*a</sup> Chuanlan He,<sup>a</sup>**

**Hengjian Huang,<sup>\*a</sup> and Dabin Liu<sup>b</sup>**

<sup>a</sup> *Institute of Chemical Materials, China Academy of Engineering Physics, Mianyang  
621900, China*

<sup>b</sup> *National Key Laboratory of Soft Chemistry and Functional Materials, Nanjing  
University of Science and Technology, Nanjing 210094, China*

\*Corresponding authors. Tel.: +86 816 2482587; Fax: +86 2495856

*E-mail:* [zhengbaohui305@163.com](mailto:zhengbaohui305@163.com) (B. Zheng); [huanghengjian@caep.cn](mailto:huanghengjian@caep.cn) (H. Huang)

Page S2-S7: The Cartesian coordinates of all the optimized geometries along with the corresponding absolute energies and BSSE energies.

**TNT+o-NT**

|   |           |           |           |
|---|-----------|-----------|-----------|
| C | 4.454186  | -1.118171 | 1.042122  |
| C | 3.091680  | -1.311858 | 1.263639  |
| C | 2.268275  | -0.190910 | 1.322000  |
| C | 2.776729  | 1.091956  | 1.136656  |
| C | 4.146225  | 1.232809  | 0.913977  |
| C | 5.053791  | 0.148848  | 0.849656  |
| N | 5.281057  | -2.365018 | 1.026645  |
| H | 2.681968  | -2.308741 | 1.385111  |
| N | 0.811072  | -0.369212 | 1.573869  |
| H | 2.122953  | 1.957520  | 1.156389  |
| N | 4.626830  | 2.640081  | 0.749483  |
| C | 6.517825  | 0.321888  | 0.521905  |
| H | 6.917754  | -0.565322 | 0.025053  |
| H | 7.097870  | 0.475670  | 1.440667  |
| H | 6.678043  | 1.194208  | -0.117186 |
| O | 4.792118  | -3.358243 | 0.455247  |
| O | 6.382067  | -2.330943 | 1.608644  |
| O | 0.388450  | -1.537665 | 1.682844  |
| O | 0.114793  | 0.660914  | 1.654189  |
| O | 3.900740  | 3.410977  | 0.094465  |
| O | 5.701820  | 2.946813  | 1.300122  |
| C | -5.135569 | -1.570779 | -0.981208 |
| C | -6.454417 | -1.689077 | -1.428478 |
| C | -7.143271 | -0.560377 | -1.891959 |
| C | -6.495027 | 0.672770  | -1.905067 |
| C | -5.177709 | 0.776964  | -1.433867 |
| C | -4.449497 | -0.340174 | -0.958043 |
| H | -6.941487 | -2.663277 | -1.418648 |
| H | -6.987635 | 1.569226  | -2.268595 |
| N | -4.580819 | 2.138457  | -1.472480 |
| C | -3.019436 | -0.311756 | -0.467021 |
| H | -2.645233 | -1.335806 | -0.355121 |
| H | -2.936290 | 0.195900  | 0.501364  |
| H | -2.360454 | 0.232834  | -1.153373 |
| O | -5.071708 | 2.966409  | -2.272513 |
| O | -3.630934 | 2.392620  | -0.699616 |
| H | -4.606328 | -2.458991 | -0.638472 |
| H | -8.170431 | -0.640543 | -2.242399 |

Sum of electronic and zero-point Energies= -1361.39964825

Counterpoise: corrected energy = -1357.973619122889

Counterpoise: BSSE energy = 0.001592560627

**TNT+p-NT**

|   |           |           |           |
|---|-----------|-----------|-----------|
| C | 4.433524  | 0.718563  | -0.786142 |
| C | 3.066468  | 0.639690  | -0.524248 |
| C | 2.452972  | -0.608018 | -0.592838 |
| C | 3.181127  | -1.757840 | -0.886065 |
| C | 4.545741  | -1.627413 | -1.138028 |
| C | 5.245790  | -0.398073 | -1.097345 |
| N | 5.015003  | 2.096012  | -0.729867 |
| H | 2.496196  | 1.526552  | -0.270426 |
| N | 0.991817  | -0.717214 | -0.331268 |
| H | 2.700565  | -2.730034 | -0.911721 |
| N | 5.258051  | -2.899469 | -1.473101 |
| C | 6.741949  | -0.301024 | -1.279230 |
| H | 6.988578  | -0.127353 | -2.334424 |
| H | 7.235457  | -1.226961 | -0.973520 |
| H | 7.153928  | 0.532540  | -0.705006 |
| O | 4.594205  | 2.849270  | 0.168596  |
| O | 5.852823  | 2.400423  | -1.600127 |
| O | 0.382009  | 0.332414  | -0.044924 |
| O | 0.477361  | -1.850043 | -0.413056 |
| O | 4.940327  | -3.911438 | -0.819912 |
| O | 6.094503  | -2.862385 | -2.395427 |
| C | -5.675988 | -0.667806 | 1.107475  |
| C | -6.747277 | 0.225207  | 1.115173  |
| C | -6.479836 | 1.599180  | 1.144968  |
| C | -5.168884 | 2.085849  | 1.167441  |
| C | -4.110436 | 1.175307  | 1.157503  |
| C | -4.341393 | -0.213337 | 1.124998  |
| H | -7.777329 | -0.117430 | 1.101354  |
| H | -4.996619 | 3.157600  | 1.193700  |
| C | -3.192349 | -1.194520 | 1.087796  |
| H | -3.397395 | -2.073169 | 1.713738  |
| H | -2.255639 | -0.736569 | 1.424967  |
| H | -3.021985 | -1.557313 | 0.063226  |
| H | -5.877353 | -1.738643 | 1.088142  |
| N | -7.608622 | 2.557413  | 1.154622  |
| O | -8.770916 | 2.093925  | 1.129684  |
| O | -7.339657 | 3.779260  | 1.185850  |
| H | -3.086716 | 1.546843  | 1.177443  |

Sum of electronic and zero-point Energies= -1361.40598501

Counterpoise: corrected energy = -1357.976442558212

Counterpoise: BSSE energy = 0.001197883074

**RDX+o-NT**

|   |           |           |           |
|---|-----------|-----------|-----------|
| C | 3.404683  | 0.866053  | 0.960342  |
| C | 4.518116  | 1.179638  | 1.745986  |
| C | 5.737296  | 0.524099  | 1.531815  |
| C | 5.823920  | -0.445189 | 0.533848  |
| C | 4.702072  | -0.737228 | -0.257155 |
| C | 3.456617  | -0.088616 | -0.074438 |
| H | 4.429955  | 1.932046  | 2.528167  |
| H | 6.746855  | -0.984827 | 0.346953  |
| N | 4.896314  | -1.778657 | -1.301101 |
| C | 2.198765  | -0.359275 | -0.871230 |
| H | 2.309094  | -0.029962 | -1.911610 |
| H | 1.360131  | 0.177821  | -0.414524 |
| H | 1.960255  | -1.429271 | -0.911262 |
| O | 5.861568  | -2.563336 | -1.167743 |
| O | 4.096488  | -1.815468 | -2.262996 |
| H | 2.457285  | 1.368570  | 1.148650  |
| H | 6.609901  | 0.760612  | 2.137768  |
| C | -4.930236 | 0.203500  | -0.268279 |
| N | -4.236162 | -1.078617 | -0.297178 |
| C | -3.074270 | -1.204933 | 0.570405  |
| N | -2.107270 | -0.105821 | 0.250514  |
| C | -2.540346 | 0.927541  | -0.709247 |
| N | -3.946916 | 1.306424  | -0.515682 |
| H | -5.376877 | 0.335018  | 0.723211  |
| H | -5.717669 | 0.209245  | -1.022269 |
| N | -4.147968 | -1.750210 | -1.609628 |
| H | -2.607869 | -2.179558 | 0.425889  |
| H | -3.406083 | -1.111078 | 1.610580  |
| N | -1.215500 | 0.248618  | 1.289874  |
| H | -2.422862 | 0.533380  | -1.724450 |
| H | -1.911301 | 1.808767  | -0.584608 |
| N | -4.231693 | 2.542878  | 0.140853  |
| O | -3.306884 | -2.649519 | -1.703631 |
| O | -4.970020 | -1.392449 | -2.459399 |
| O | -1.150088 | -0.559763 | 2.236555  |
| O | -0.543682 | 1.285348  | 1.143402  |
| O | -5.400337 | 2.666641  | 0.553125  |
| O | -3.325282 | 3.387578  | 0.188491  |

Sum of electronic and zero-point Energies= -1373.78831063

Counterpoise: corrected energy = -1370.361915490549

Counterpoise: BSSE energy = 0.002966408057

**RDX+p-NT**

|   |           |           |           |
|---|-----------|-----------|-----------|
| C | 4.118615  | -1.373393 | 1.927772  |
| C | 5.503465  | -1.223118 | 1.829783  |
| C | 6.027537  | 0.046612  | 1.565116  |
| C | 5.195564  | 1.159996  | 1.403354  |
| C | 3.814103  | 0.988156  | 1.504757  |
| C | 3.249815  | -0.276972 | 1.764960  |
| H | 6.177718  | -2.064485 | 1.957269  |
| C | 1.749794  | -0.452403 | 1.842759  |
| H | 1.473508  | -1.306879 | 2.472501  |
| H | 1.329093  | -0.632785 | 0.841463  |
| H | 1.258137  | 0.443136  | 2.241903  |
| H | 3.704076  | -2.359159 | 2.136802  |
| N | 7.495287  | 0.216012  | 1.454807  |
| H | 3.160322  | 1.851281  | 1.382718  |
| H | 5.636888  | 2.132138  | 1.205906  |
| O | 8.213840  | -0.797093 | 1.604696  |
| O | 7.934465  | 1.362673  | 1.215340  |
| C | -4.991746 | 0.275412  | -1.442994 |
| N | -4.480523 | -0.987689 | -1.959706 |
| C | -3.287143 | -1.535151 | -1.290643 |
| N | -2.390883 | -0.430863 | -0.854636 |
| C | -2.526092 | 0.825214  | -1.601364 |
| N | -3.924911 | 1.311515  | -1.591682 |
| H | -5.253605 | 0.125524  | -0.387202 |
| H | -5.879908 | 0.576454  | -1.995349 |
| N | -4.536567 | -1.143711 | -3.421142 |
| H | -2.774041 | -2.190266 | -1.996823 |
| H | -3.577923 | -2.104354 | -0.404501 |
| N | -2.180776 | -0.310528 | 0.576975  |
| H | -2.217791 | 0.616615  | -2.631885 |
| H | -1.884959 | 1.597508  | -1.178477 |
| N | -4.196273 | 2.562266  | -0.971835 |
| O | -3.832169 | -2.040270 | -3.904545 |
| O | -5.336788 | -0.414525 | -4.015514 |
| O | -2.361510 | -1.339079 | 1.248192  |
| O | -1.769054 | 0.784725  | 0.985382  |
| O | -5.374731 | 2.728090  | -0.603270 |
| O | -3.264837 | 3.379394  | -0.910890 |

Sum of electronic and zero-point Energies= -1373.79359441

Counterpoise: corrected energy = -1370.364915331080

Counterpoise: BSSE energy = 0.001780888389

**TNT+RDX**

|   |           |           |           |
|---|-----------|-----------|-----------|
| C | 3.536703  | 1.256685  | 0.543252  |
| C | 4.875649  | 1.273899  | 0.152945  |
| C | 5.534929  | 0.056756  | 0.007801  |
| C | 4.893326  | -1.149326 | 0.272458  |
| C | 3.555475  | -1.113942 | 0.666890  |
| C | 2.811420  | 0.077889  | 0.834501  |
| N | 2.877710  | 2.597159  | 0.624330  |
| H | 5.388444  | 2.211370  | -0.033891 |
| N | 6.960813  | 0.045613  | -0.429467 |
| H | 5.420050  | -2.092489 | 0.174797  |
| N | 2.922210  | -2.449322 | 0.896882  |
| C | 1.394129  | 0.094192  | 1.356916  |
| H | 1.214077  | -0.748579 | 2.029613  |
| H | 0.682189  | 0.009158  | 0.526608  |
| H | 1.175615  | 1.025798  | 1.883665  |
| O | 3.549499  | 3.529495  | 1.102962  |
| O | 1.718378  | 2.691540  | 0.176049  |
| O | 7.503595  | 1.148757  | -0.630597 |
| O | 7.507744  | -1.066052 | -0.561435 |
| O | 3.622978  | -3.320513 | 1.444754  |
| O | 1.751923  | -2.606115 | 0.496649  |
| C | -5.116795 | -0.154665 | -0.809479 |
| N | -4.327052 | -1.301388 | -1.238308 |
| C | -3.147573 | -1.627283 | -0.420112 |
| N | -2.512851 | -0.380784 | 0.092800  |
| C | -2.788560 | 0.833578  | -0.686538 |
| N | -4.244023 | 1.057887  | -0.845290 |
| H | -5.472862 | -0.353573 | 0.209692  |
| H | -5.971420 | -0.015846 | -1.469267 |
| N | -4.175014 | -1.456700 | -2.693434 |
| H | -2.445203 | -2.186319 | -1.040870 |
| H | -3.441555 | -2.234060 | 0.439773  |
| N | -2.495583 | -0.227255 | 1.538994  |
| H | -2.331341 | 0.687648  | -1.671422 |
| H | -2.350651 | 1.709277  | -0.208463 |
| N | -4.808409 | 2.233355  | -0.275717 |
| O | -3.266331 | -2.207500 | -3.072825 |
| O | -5.015379 | -0.882380 | -3.393066 |
| O | -2.593988 | -1.269314 | 2.205615  |
| O | -2.304490 | 0.919052  | 1.967942  |
| O | -6.033120 | 2.179655  | -0.052000 |
| O | -4.054655 | 3.204640  | -0.113709 |

Sum of electronic and zero-point Energies= -1782.94851711

Counterpoise: corrected energy = -1778.559914613296

Counterpoise: BSSE energy = 0.003484801495
